# Supplementary material for: Increase in the prevalence of mutations associated with sulfadoxine–pyrimethamine resistance in Plasmodium falciparum isolates collected from early to late pregnancy in Nanoro, Burkina Faso
Source: Springer Nature journal article supplement (doi:10.1186/s12936-017-1831-y), 2017-04-28
Supplement: MOESM1 [file 12255630]

Table S1. Prevalence of *P. falciparum dhps* and *dhfr* mutations in ANC, delivery and GP samples.

| <i>dhps</i>        |                    |          |                    |          |                    |          |
|--------------------|--------------------|----------|--------------------|----------|--------------------|----------|
|                    | ANC booking        |          | Delivery           |          | GP                 |          |
| Codons             | % mutant (95% CI)  | <i>n</i> | % mutant (95% CI)  | <i>n</i> | % mutant (95% CI)  | <i>n</i> |
| S436               | 70.3 (64.3 – 75.4) | 359      | 72.1 (65.5 – 77.9) | 175      | 78.9 (74.6 – 82.5) | 353      |
| A437               | 78.4 (75.4 – 81.3) | 359      | 86.8 (59.9 – 91.5) | 175      | 84.8 (80.2 – 88.6) | 353      |
| K540               | 0                  | 359      | 1.1 (0.3 – 4.4)    | 175      | 1.1 (0.4 – 2.7)    | 358      |
| double <i>dhps</i> | 0                  | 359      | 1.1 (0.3 – 4.4)    | 175      | 1.1 (0.4 – 2.8)    | 352      |
| <i>dhfr</i>        |                    |          |                    |          |                    |          |
| N51                | 63.9 (59.1 – 68.6) | 380      | 72.7 (66.2 – 78.4) | 182      | 77.6 (71.7 – 82.5) | 355      |
| C59                | 71.7 (67.0 – 75.8) | 380      | 83.2 (76.7 – 88.1) | 182      | 83.2 (78.4 – 87.0) | 355      |
| S108               | 74.3 (69.6 – 78.4) | 380      | 86.4 (80.4 – 90.9) | 182      | 86.5 (82.2 – 90.8) | 355      |
| triple <i>dhfr</i> | 61.1 (56.2 – 65.2) | 380      | 70.5 (63.9 – 76.5) | 182      | 73.9 (67.9 – 78.9) | 355      |
| quintuple          | 0                  | 353      | 1.2 (0.3 – 4.6)    | 168      | 0.9 (0.3 – 2.6)    | 336      |
