# Supplementary material for: Increase in the prevalence of mutations associated with sulfadoxine–pyrimethamine resistance in Plasmodium falciparum isolates collected from early to late pregnancy in Nanoro, Burkina Faso
Source: Springer Nature journal article supplement (doi:10.1186/s12936-017-1831-y), 2017-04-28
Supplement: MOESM2 [file 12255630]

Table S2. Univariate mixed-effects logistic regression for *dhfr* and *dhps* mutations in *P. falciparum* positive samples

Odds ratios (OR) with 95% CI and *p* values are presented of univariate models (*p* values <0.05 in bold).

| <i>dhfr</i><br>Fixed effect(s) | Samples     | N51  |          |      |              | C59  |         |       |              | S108 |         |       |              | triple <i>dhfr</i> |         |      |              |
|--------------------------------|-------------|------|----------|------|--------------|------|---------|-------|--------------|------|---------|-------|--------------|--------------------|---------|------|--------------|
|                                |             | OR   | [95% CI] |      | <i>p</i>     | OR   | [95%CI] |       | <i>p</i>     | OR   | [95%CI] |       | <i>p</i>     | OR                 | [95%CI] |      | <i>p</i>     |
| Age (per 10 years)             | ANC         | 0.59 | 0.42     | 0.84 | <b>0.004</b> | 0.70 | 0.48    | 1.01  | 0.058        | 0.78 | 0.54    | 1.15  | 0.213        | 0.61               | 0.43    | 0.86 | <b>0.005</b> |
|                                | Del         | 1.32 | 0.80     | 2.17 | 0.279        | 1.75 | 0.92    | 3.33  | 0.087        | 2.30 | 1.09    | 4.83  | <b>0.028</b> | 1.32               | 0.81    | 2.15 | 0.265        |
|                                | GP          | 1.01 | 0.86     | 1.18 | 0.949        | 0.89 | 0.76    | 1.05  | 0.175        | 0.85 | 0.72    | 1.02  | 0.079        | 1.03               | 0.88    | 1.20 | 0.729        |
| Parasitaemia (log scale)       | ANC         | 1.20 | 0.95     | 1.53 | 0.133        | 1.01 | 0.78    | 1.30  | 0.965        | 1.02 | 0.79    | 1.33  | 0.859        | 1.20               | 0.94    | 1.52 | 0.136        |
|                                | Del         | 0.80 | 0.61     | 1.03 | 0.086        | 0.84 | 0.61    | 1.15  | 0.280        | 0.72 | 0.51    | 1.03  | 0.073        | 0.83               | 0.64    | 1.07 | 0.154        |
|                                | GP          | 1.16 | 0.89     | 1.52 | 0.270        | 1.17 | 0.88    | 1.57  | 0.278        | 1.27 | 0.92    | 1.75  | 0.148        | 1.15               | 0.90    | 1.49 | 0.269        |
| Gravidity                      | ANC         | 0.92 | 0.83     | 1.02 | 0.100        | 0.93 | 0.84    | 1.04  | 0.212        | 0.97 | 0.86    | 1.08  | 0.569        | 0.91               | 0.82    | 1.01 | 0.075        |
|                                | Del         | 1.20 | 1.03     | 1.41 | <b>0.021</b> | 1.27 | 1.04    | 1.56  | <b>0.020</b> | 1.39 | 1.09    | 1.77  | <b>0.009</b> | 1.20               | 1.03    | 1.40 | <b>0.019</b> |
| Season#                        | ANC         | 1.00 | 0.66     | 1.52 | 0.990        | 1.01 | 0.64    | 1.57  | 0.975        | 1.00 | 0.63    | 1.59  | 0.994        | 0.98               | 0.65    | 1.48 | 0.926        |
|                                | Del         | 3.98 | 1.67     | 9.53 | <b>0.002</b> | 4.98 | 1.86    | 13.37 | <b>0.001</b> | 5.42 | 2.05    | 14.29 | <b>0.001</b> | 4.37               | 1.77    | 10.8 | <b>0.001</b> |
| SP doses                       | Del         | 1.01 | 0.71     | 1.42 | 0.966        | 1.26 | 0.80    | 2.00  | 0.320        | 1.41 | 0.83    | 2.41  | 0.204        | 0.97               | 0.88    | 0.70 | 0.881        |
| AL                             | Del         | 0.33 | 0.17     | 0.64 | <b>0.001</b> | 0.59 | 0.27    | 1.30  | 0.190        | 0.61 | 0.26    | 1.45  | 0.268        | 0.37               | 0.19    | 0.70 | <b>0.002</b> |
| Visit                          | ANC & Del*  | 1.54 | 0.97     | 2.47 | 0.069        | 2.09 | 1.17    | 3.75  | <b>0.013</b> | 2.64 | 1.20    | 5.81  | <b>0.016</b> | 1.52               | 1.04    | 2.21 | <b>0.029</b> |
|                                | ANC & GP**  | 1.93 | 1.39     | 2.68 | <b>0.000</b> | 1.95 | 1.37    | 2.79  | <b>0.000</b> | 2.22 | 1.52    | 3.25  | <b>0.000</b> | 1.79               | 1.30    | 2.45 | <b>0.000</b> |
|                                | GP & Del*** | 0.76 | 0.50     | 1.15 | 0.201        | 1.02 | 0.63    | 1.64  | 0.950        | 1.01 | 0.60    | 1.70  | 0.980        | 0.84               | 0.56    | 1.26 | 0.394        |

| <i>dhps</i><br>Fixed effect(s) | Samples     | S436 |          |      |              | A437 |         |      |              |
|--------------------------------|-------------|------|----------|------|--------------|------|---------|------|--------------|
|                                |             | OR   | [95% CI] |      | <i>p</i>     | OR   | [95%CI] |      | <i>p</i>     |
| Age (per 10 years)             | ANC         | 1.08 | 0.73     | 1.60 | 0.696        | 0.79 | 0.52    | 1.19 | 0.266        |
|                                | Del         | 1.12 | 0.67     | 1.87 | 0.653        | 0.68 | 0.31    | 1.48 | 0.325        |
|                                | GP          | 0.86 | 0.75     | 0.99 | <b>0.042</b> | 0.91 | 0.77    | 1.08 | 0.284        |
| Parasitaemia (log scale)       | ANC         | 1.31 | 1.00     | 1.72 | 0.052        | 1.13 | 0.84    | 1.52 | 0.429        |
|                                | Del         | 1.04 | 0.80     | 1.36 | 0.753        | 0.85 | 0.59    | 1.23 | 0.395        |
|                                | GP          | 1.18 | 0.90     | 1.53 | 0.229        | 1.35 | 0.98    | 1.84 | 0.062        |
| Gravidity                      | ANC         | 0.97 | 0.87     | 1.08 | 0.583        | 0.95 | 0.84    | 1.07 | 0.418        |
|                                | Del         | 1.05 | 0.90     | 1.22 | 0.563        | 0.92 | 0.73    | 1.15 | 0.453        |
| Season#                        | ANC         | 1.47 | 0.92     | 2.36 | 0.109        | 0.71 | 0.42    | 1.18 | 0.184        |
|                                | Del         | 2.05 | 0.84     | 4.99 | 0.113        | 1.52 | 0.43    | 5.38 | 0.518        |
| SP doses                       | Del         | 0.97 | 0.69     | 1.36 | 0.848        | 1.43 | 0.81    | 2.53 | 0.216        |
| AL                             | Del         | 0.73 | 0.37     | 1.43 | 0.357        | 0.44 | 0.17    | 1.12 | 0.085        |
| Visit                          | ANC & Del*  | 1.06 | 0.64     | 1.75 | 0.823        | 1.72 | 1.03    | 2.85 | <b>0.037</b> |
|                                | ANC & GP**  | 1.57 | 1.11     | 2.23 | <b>0.010</b> | 1.44 | 0.98    | 2.12 | 0.066        |
|                                | GP & Del*** | 0.69 | 0.46     | 1.05 | 0.086        | 1.17 | 0.68    | 2.01 | 0.568        |

AL = artemether-lumefantrine therapy; Del = delivery; # low transmission season = 0, high transmission season = 1; \*ANC booking = 0, Delivery = 1; \*\*ANC booking = 0, GP = 1; \*\*\* GP = 0, Del = 1
