# Supplementary material for: Increase in the prevalence of mutations associated with sulfadoxine–pyrimethamine resistance in Plasmodium falciparum isolates collected from early to late pregnancy in Nanoro, Burkina Faso
Source: Springer Nature journal article supplement (doi:10.1186/s12936-017-1831-y), 2017-04-28
Supplement: MOESM3 [file 12255630]

Table S3. Univariate mixed-effects logistic regression for low birth weight in *P. falciparum* positive women at delivery

Odds ratios (OR) with 95% CI and *p* values are presented of univariate models (*p* values <0.05 in bold).

| <i>dhfr</i><br>Fixed effect(s) | LBW  |         |      |              |
|--------------------------------|------|---------|------|--------------|
|                                | OR   | [95%CI] |      | <i>p</i>     |
| Triple <i>dhfr</i> mutation    | 0.95 | 0.39    | 2.30 | 0.905        |
| Age (10 years)                 | 0.53 | 0.28    | 0.99 | <b>0.046</b> |
| Gravidity                      | 0.74 | 0.60    | 0.91 | <b>0.004</b> |
| Season#                        | 1.54 | 0.49    | 4.89 | 0.463        |
| IPTp-SP doses                  | 0.47 | 0.28    | 0.78 | <b>0.003</b> |
| AL                             | 1.09 | 0.69    | 1.75 | 0.705        |

AL = artemether-lumefantrine therapy; LBW = low birth weight; # low transmission season = 0, high transmission season = 1;
