# Supplementary material for: Increase in the prevalence of mutations associated with sulfadoxine–pyrimethamine resistance in Plasmodium falciparum isolates collected from early to late pregnancy in Nanoro, Burkina Faso
Source: Springer Nature journal article supplement (doi:10.1186/s12936-017-1831-y), 2017-04-28
Supplement: MOESM4 [file 12255630]

Table S4. Multivariate mixed-effects logistic regression for *dhfr* and *dhps* mutations in pregnant women (recent IPTp-SP use)

Odds ratios (OR) with 95% CI and p values are presented (p values <0.05 in bold).

| <i>dhfr</i><br>Fixed effects        | N51  |        |       |              | C59  |        |       |              | S108 |        |       |              | Triple <i>dhfr</i> |        |       |              |
|-------------------------------------|------|--------|-------|--------------|------|--------|-------|--------------|------|--------|-------|--------------|--------------------|--------|-------|--------------|
|                                     | OR   | 95% CI |       | <i>p</i>     | OR   | 95% CI |       | <i>p</i>     | OR   | 95% CI |       | <i>p</i>     | OR                 | 95% CI |       | <i>p</i>     |
| Age (10 years)                      | 0.30 | 0.12   | 0.75  | <b>0.010</b> | 0.47 | 0.17   | 1.28  | 0.139        | 0.48 | 0.17   | 1.35  | 0.166        | 0.38               | 0.19   | 0.80  | <b>0.010</b> |
| Gravidity                           | 0.24 | 0.97   | 1.59  | 0.087        | 1.12 | 0.84   | 1.48  | 0.439        | 1.16 | 0.86   | 1.57  | 0.326        | 1.17               | 0.94   | 1.45  | 0.165        |
| Season#                             | 1.06 | 0.67   | 1.66  | 0.818        | 1.05 | 0.61   | 1.82  | 0.849        | 1.03 | 0.58   | 1.82  | 0.920        | 1.03               | 0.67   | 1.57  | 0.896        |
| Recent IPTp-SP <sup>†</sup>         | 2.16 | 0.83   | 5.65  | 0.116        | 1.76 | 0.52   | 5.96  | 0.362        | 2.73 | 0.63   | 11.79 | 0.178        | 1.71               | 0.73   | 4.01  | 0.219        |
| AL                                  | 0.74 | 0.43   | 1.28  | 0.276        | 0.87 | 0.42   | 1.80  | 0.713        | 1.16 | 0.52   | 2.56  | 0.718        | 0.75               | 0.47   | 1.22  | 0.249        |
| Visit*                              | 0.19 | 0.03   | 1.23  | 0.081        | 0.24 | 0.03   | 2.33  | 0.219        | 0.20 | 0.02   | 2.38  | 0.201        | 0.18               | 0.03   | 0.97  | <b>0.045</b> |
| SeasonXvisit                        | 4.77 | 1.45   | 15.71 | <b>0.010</b> | 6.11 | 1.17   | 31.92 | <b>0.032</b> | 7.99 | 1.34   | 47.83 | <b>0.023</b> | 4.61               | 1.64   | 12.93 | <b>0.004</b> |
| -Visit* in high transmission season | 0.93 | 0.18   | 4.68  | 0.926        | 1.47 | 0.19   | 11.61 | 0.712        | 1.58 | 0.16   | 15.54 | 0.697        | 0.84               | 0.18   | 3.80  | 0.819        |
| -Season# in Del samples             | 5.03 | 1.64   | 15.39 | <b>0.005</b> | 6.45 | 1.33   | 31.34 | <b>0.021</b> | 8.23 | 1.48   | 45.78 | <b>0.016</b> | 4.74               | 1.85   | 12.17 | <b>0.001</b> |
| AgeXvisit                           | 0.95 | 0.23   | 3.98  | 0.940        | 1.22 | 0.20   | 7.51  | 0.827        | 1.59 | 0.21   | 12.12 | 0.654        | 0.82               | 0.21   | 3.10  | 0.764        |
| -Age in Del samples                 | 0.29 | 0.08   | 1.10  | 0.068        | 0.58 | 0.11   | 3.07  | 0.518        | 0.77 | 0.12   | 5.040 | 0.786        | 0.31               | 0.10   | 0.96  | <b>0.042</b> |
| GravidityXvisit                     | 1.27 | 0.80   | 2.02  | 0.308        | 1.28 | 0.71   | 2.32  | 0.413        | 1.90 | 0.67   | 2.51  | 0.449        | 1.32               | 0.87   | 2.00  | 0.197        |
| -Gravidity in Del samples           | 1.58 | 1.03   | 2.43  | <b>0.038</b> | 1.43 | 0.83   | 2.48  | 0.200        | 1.50 | 0.80   | 2.82  | 0.205        | 1.53               | 1.07   | 2.19  | <b>0.019</b> |

| <i>dhps</i><br>Fixed effects        | S436 |        |      |          | A437 |        |       |          |
|-------------------------------------|------|--------|------|----------|------|--------|-------|----------|
|                                     | OR   | 95% CI |      | <i>p</i> | OR   | 95% CI |       | <i>p</i> |
| Age (10 years)                      | 2.52 | 0.80   | 7.97 | 0.115    | 0.71 | 0.29   | 1.70  | 0.440    |
| Gravidity                           | 0.75 | 0.54   | 1.06 | 0.099    | 1.05 | 0.81   | 1.36  | 0.717    |
| Season#                             | 1.67 | 0.89   | 3.13 | 0.112    | 0.71 | 0.43   | 1.20  | 0.205    |
| Recent IPTp-SP <sup>†</sup>         | 1.07 | 0.40   | 2.87 | 0.892    | 2.54 | 0.68   | 9.44  | 0.166    |
| AL                                  | 0.85 | 0.48   | 1.52 | 0.587    | 0.58 | 0.32   | 1.03  | 0.061    |
| Visit*                              | 0.26 | 0.03   | 2.46 | 0.239    | 1.44 | 0.19   | 11.12 | 0.725    |
| SeasonXvisit                        | 1.45 | 0.39   | 5.49 | 0.581    | 2.52 | 0.62   | 10.26 | 0.197    |
| -Visit* in high transmission season | 0.38 | 0.05   | 3.13 | 0.365    | 3.63 | 0.50   | 26.67 | 0.204    |
| -Season# in Del samples             | 2.42 | 0.69   | 8.49 | 0.166    | 1.80 | 0.49   | 6.64  | 0.377    |
| AgeXvisit                           | 0.42 | 0.07   | 2.64 | 0.353    | 0.93 | 0.17   | 5.23  | 0.934    |
| -Age in Del samples                 | 1.05 | 0.25   | 4.49 | 0.945    | 0.66 | 0.15   | 2.91  | 0.581    |
| GravidityXvisit                     | 1.34 | 0.76   | 2.34 | 0.313    | 0.92 | 0.55   | 1.54  | 0.745    |
| -Gravidity in Del samples           | 1.00 | 0.65   | 1.56 | 0.987    | 0.96 | 0.62   | 1.51  | 0.869    |

Del = delivery; †= IPTp-SP dose in past 30 days (0 = no, 1 = yes); #low transmission season = 0, high transmission season = 1; \*ANC1 = 0, Delivery = 1; age centred at 25 years
