# Supplementary material for: Increase in the prevalence of mutations associated with sulfadoxine–pyrimethamine resistance in Plasmodium falciparum isolates collected from early to late pregnancy in Nanoro, Burkina Faso
Source: Springer Nature journal article supplement (doi:10.1186/s12936-017-1831-y), 2017-04-28
Supplement: MOESM5 [file 12255630]

Table S5. Multivariate mixed-effects logistic regression for low birth weight in *P. falciparum* positive women at delivery

Odds ratios (OR) with 95% CI and *p* values are presented of univariate models (*p* values <0.05 in bold).

| <i>dhfr</i><br>Fixed effect(s) | LBW  |         |      |              |
|--------------------------------|------|---------|------|--------------|
|                                | OR   | [95%CI] |      | <i>p</i>     |
| Triple <i>dhfr</i> mutation    | 1.13 | 0.40    | 3.15 | 0.818        |
| Age (10 years)                 | 1.17 | 0.99    | 1.38 | 0.066        |
| Gravidity                      | 0.45 | 0.24    | 0.83 | <b>0.010</b> |
| Season#                        | 1.38 | 0.29    | 6.53 | 0.687        |
| IPTp-SP doses                  | 0.40 | 0.20    | 0.79 | <b>0.008</b> |
| AL                             | 0.75 | 0.40    | 1.40 | 0.367        |

AL = artemether-lumefantrine therapy; LBW = low birth weight; # low transmission season = 0, high transmission season = 1;
