# Supplementary material for: Increase in the prevalence of mutations associated with sulfadoxine–pyrimethamine resistance in Plasmodium falciparum isolates collected from early to late pregnancy in Nanoro, Burkina Faso
Source: Springer Nature journal article supplement (doi:10.1186/s12936-017-1831-y), 2017-04-28
Supplement: MOESM6 [file 12255630]

Table S6. Multivariate mixed-effects logistic regression for *dhfr* and *dhps* mutations in ANC and GP samples (sensitivity analysis)

Odds ratios (OR) with 95% CI and p values are presented (p values <0.05 in bold).

| <i>dhfr</i><br>Fixed effects | <b>N51</b> |        |      |              | <b>C59</b> |        |      |          | <b>S108</b> |        |      |          | <b>Triple <i>dhfr</i></b> |        |      |              |
|------------------------------|------------|--------|------|--------------|------------|--------|------|----------|-------------|--------|------|----------|---------------------------|--------|------|--------------|
|                              | OR         | 95% CI |      | <i>P</i>     | OR         | 95% CI |      | <i>P</i> | OR          | 95% CI |      | <i>P</i> | OR                        | 95% CI |      | <i>P</i>     |
| Age (10 years) †             | 0.59       | 0.41   | 0.84 | <b>0.004</b> | 0.70       | 0.48   | 1.01 | 0.057    | 0.78        | 0.53   | 1.15 | 0.213    | 0.60                      | 0.42   | 0.86 | <b>0.005</b> |
| Season#                      | 1.06       | 0.69   | 1.62 | 0.798        | 1.05       | 0.67   | 1.64 | 0.847    | 1.02        | 0.64   | 1.63 | 0.926    | 1.03                      | 0.68   | 1.57 | 0.877        |
| Visit*                       | 2.36       | 1.28   | 4.35 | <b>0.006</b> | 1.48       | 0.81   | 2.71 | 0.206    | 1.94        | 0.97   | 3.86 | 0.060    | 1.89                      | 1.08   | 3.32 | <b>0.025</b> |
| AgeXvisit                    | 1.28       | 0.70   | 2.33 | 0.421        | 1.06       | 0.59   | 1.93 | 0.841    | 0.78        | 0.41   | 1.49 | 0.455    | 1.43                      | 0.81   | 2.52 | 0.217        |
| -Age in GP samples           | 0.75       | 0.47   | 1.22 | 0.246        | 0.74       | 0.46   | 1.18 | 0.203    | 0.61        | 0.36   | 1.03 | 0.064    | 0.86                      | 0.68   | 1.57 | 0.877        |

| <i>dhps</i><br>Fixed effects | <b>S436</b> |        |      |          | <b>A437</b> |        |      |          |
|------------------------------|-------------|--------|------|----------|-------------|--------|------|----------|
|                              | OR          | 95% CI |      | <i>P</i> | OR          | 95% CI |      | <i>P</i> |
| Age (10 years) †             | 1.03        | 0.69   | 1.53 | 0.882    | 0.81        | 0.54   | 1.23 | 0.336    |
| Season#                      | 1.51        | 0.93   | 2.44 | 0.092    | 0.71        | 0.43   | 1.20 | 0.205    |
| Visit*                       | 1.53        | 0.85   | 2.76 | 0.154    | 0.93        | 0.49   | 1.77 | 0.822    |
| AgeXvisit                    | 0.86        | 0.46   | 1.58 | 0.622    | 1.17        | 0.61   | 2.23 | 0.639    |
| -Age in GP samples           | 0.88        | 0.55   | 1.41 | 0.603    | 0.95        | 0.58   | 1.57 | 0.854    |

† = age centred at 25 years and restricted to ages 15 - 45 years; # low transmission season = 0, high transmission season = 1; \*ANC booking = 0, GP = 1;
