# Supplementary material for: Increase in the prevalence of mutations associated with sulfadoxine–pyrimethamine resistance in Plasmodium falciparum isolates collected from early to late pregnancy in Nanoro, Burkina Faso
Source: Springer Nature journal article supplement (doi:10.1186/s12936-017-1831-y), 2017-04-28
Supplement: MOESM7 [file 12255630]

Table S7. Univariate mixed effects logistic regression for *dhfr* and *dhps* gene mutations (pure mutants versus wild type/mixed)

Odds ratios (OR) with 95% CI and *p* values are presented (*p* values <0.05 in bold).

| <i>dhfr</i>                 |            | <b>N51</b> |          |      |              | <b>C59</b> |         |      |              | <b>S108</b> |         |      |              | <b>triple <i>dhfr</i></b> |         |      |              |
|-----------------------------|------------|------------|----------|------|--------------|------------|---------|------|--------------|-------------|---------|------|--------------|---------------------------|---------|------|--------------|
| Fixed effect(s)             | Samples    | OR         | [95% CI] |      | <i>p</i>     | OR         | [95%CI] |      | <i>p</i>     | OR          | [95%CI] |      | <i>p</i>     | OR                        | [95%CI] |      | <i>p</i>     |
| Age<br>(per 10 years)       | ANC        | 0.82       | 0.58     | 1.15 | 0.245        | 0.94       | 0.66    | 1.33 | 0.712        | 0.96        | 0.67    | 1.37 | 0.820        | 0.83                      | 0.58    | 1.18 | 0.294        |
|                             | Del        | 1.46       | 0.90     | 2.37 | 0.130        | 1.55       | 0.89    | 2.68 | 0.118        | 1.65        | 0.89    | 3.07 | 0.110        | 1.28                      | 0.81    | 2.01 | 0.287        |
|                             | GP         | 1.14       | 1.00     | 1.31 | <b>0.048</b> | 1.04       | 0.91    | 1.19 | 0.591        | 0.99        | 0.87    | 1.13 | 0.890        | 1.18                      | 1.03    | 1.35 | <b>0.015</b> |
| Parasitaemia<br>(log scale) | ANC        | 1.11       | 0.88     | 1.39 | 0.390        | 0.92       | 0.73    | 1.17 | 0.502        | 0.93        | 0.73    | 1.17 | 0.521        | 1.14                      | 0.91    | 1.44 | 0.260        |
|                             | Del        | 0.77       | 0.59     | 1.00 | <b>0.047</b> | 0.85       | 0.64    | 1.13 | 0.263        | 0.87        | 0.64    | 1.19 | 0.389        | 0.80                      | 0.62    | 1.01 | 0.055        |
|                             | GP         | 0.85       | 0.68     | 1.06 | 0.150        | 0.87       | 0.70    | 1.09 | 0.229        | 0.93        | 0.74    | 1.16 | 0.494        | 0.77                      | 0.62    | 0.97 | <b>0.026</b> |
| Gravity                     | ANC        | 0.99       | 0.89     | 1.09 | 0.770        | 1.02       | 0.92    | 1.13 | 0.684        | 1.04        | 0.93    | 1.15 | 0.505        | 0.99                      | 0.89    | 1.10 | 0.841        |
|                             | Del        | 1.23       | 1.06     | 1.44 | <b>0.008</b> | 1.21       | 1.02    | 1.44 | <b>0.027</b> | 1.28        | 1.05    | 1.56 | <b>0.014</b> | 1.20                      | 1.04    | 1.38 | <b>0.011</b> |
| Season#                     | ANC        | 1.14       | 0.76     | 1.71 | 0.514        | 1.15       | 0.76    | 1.74 | 0.517        | 1.21        | 0.80    | 1.83 | 0.378        | 1.26                      | 0.84    | 1.90 | 0.267        |
|                             | Del        | 2.96       | 1.25     | 6.99 | <b>0.013</b> | 2.65       | 1.12    | 6.27 | <b>0.026</b> | 2.97        | 1.19    | 7.42 | <b>0.020</b> | 2.43                      | 1.07    | 5.49 | <b>0.033</b> |
| IPTp-SP doses               | Del        | 1.07       | 0.77     | 1.51 | 0.678        | 1.32       | 0.88    | 1.98 | 0.178        | 1.46        | 0.91    | 2.36 | 0.119        | 1.14                      | 0.82    | 1.57 | 0.436        |
| AL                          | Del        | 0.72       | 0.48     | 1.08 | 0.108        | 0.83       | 0.53    | 1.29 | 0.406        | 0.70        | 0.43    | 1.12 | 0.137        | 0.75                      | 0.51    | 1.11 | 0.150        |
| Visit                       | ANC & Del* | 2.43       | 1.68     | 3.50 | <b>0.000</b> | 2.68       | 1.79    | 4.03 | <b>0.000</b> | 3.11        | 2.04    | 4.75 | <b>0.000</b> | 2.22                      | 1.55    | 3.18 | <b>0.000</b> |
|                             | ANC & GP** | 1.02       | 0.76     | 1.36 | 0.912        | 1.00       | 0.74    | 1.35 | 0.996        | 0.94        | 0.70    | 1.26 | 0.673        | 0.89                      | 0.67    | 1.20 | 0.455        |

| <i>dhps</i>                 |            | <b>S436</b> |          |      |              | <b>A437</b> |         |      |              |
|-----------------------------|------------|-------------|----------|------|--------------|-------------|---------|------|--------------|
| Fixed effect(s)             | Samples    | OR          | [95% CI] |      | <i>p</i>     | OR          | [95%CI] |      | <i>p</i>     |
| Age<br>(per 10 years)       | ANC        | 1.28        | 0.91     | 1.80 | 0.162        | 0.89        | 0.62    | 1.28 | 0.533        |
|                             | Del        | 1.13        | 0.69     | 1.86 | 0.619        | 0.79        | 0.39    | 1.58 | 0.501        |
|                             | GP         | 1.01        | 0.89     | 1.15 | 0.844        | 1.21        | 1.05    | 1.40 | <b>0.009</b> |
| Parasitaemia<br>(log scale) | ANC        | 1.01        | 0.80     | 1.29 | 0.916        | 0.96        | 0.74    | 1.24 | 0.756        |
|                             | Del        | 0.99        | 0.76     | 1.27 | 0.910        | 0.87        | 0.61    | 1.22 | 0.416        |
|                             | GP         | 0.92        | 0.74     | 1.15 | 0.486        | 0.90        | 0.72    | 1.12 | 0.340        |
| Gravity                     | ANC        | 1.04        | 0.94     | 1.15 | 0.479        | 0.99        | 0.89    | 1.10 | 0.880        |
|                             | Del        | 1.02        | 0.88     | 1.18 | 0.757        | 0.99        | 0.81    | 1.22 | 0.948        |
| Season#                     | ANC        | 1.51        | 1.00     | 2.30 | 0.051        | 0.75        | 0.48    | 1.17 | 0.204        |
|                             | Del        | 1.43        | 0.57     | 3.58 | 0.446        | 1.17        | 0.35    | 3.96 | 0.800        |
| IPTp-SP doses               | Del        | 0.92        | 0.66     | 1.29 | 0.633        | 1.63        | 0.94    | 2.83 | 0.080        |
| AL                          | Del        | 0.93        | 0.62     | 1.39 | 0.710        | 0.68        | 0.41    | 1.11 | 0.122        |
| Visit                       | ANC & Del* | 1.87        | 1.14     | 3.07 | <b>0.014</b> | 2.72        | 1.71    | 4.33 | <b>0.000</b> |
|                             | ANC & GP** | 0.76        | 0.57     | 1.02 | 0.071        | 0.74        | 0.54    | 1.01 | 0.057        |

Del = delivery; AL = artemether-lumefantrine therapy #dry season = 0, rainy season = 1; \*ANC booking = 0, Delivery = 1; \*\*ANC booking = 0, GP = 1
