# Supplementary material for: Increase in the prevalence of mutations associated with sulfadoxine–pyrimethamine resistance in Plasmodium falciparum isolates collected from early to late pregnancy in Nanoro, Burkina Faso
Source: Springer Nature journal article supplement (doi:10.1186/s12936-017-1831-y), 2017-04-28
Supplement: MOESM8 [file 12255630]

Table S8. Multivariate mixed effects logistic regression for *dhfr* and *dhps* gene mutations in pregnant women (pure mutants versus wild type/mixed)

Odds ratios (OR) with 95% CI and *p* values are presented (*p* values <0.05 in bold).

| <i>dhfr</i><br>Fixed effect(s)      | N51  |          |      |              | C59  |         |      |              | S108 |         |       |              | triple <i>dhfr</i> |         |      |              |
|-------------------------------------|------|----------|------|--------------|------|---------|------|--------------|------|---------|-------|--------------|--------------------|---------|------|--------------|
|                                     | OR   | [95% CI] |      | <i>p</i>     | OR   | [95%CI] |      | <i>p</i>     | OR   | [95%CI] |       | <i>p</i>     | OR                 | [95%CI] |      | <i>p</i>     |
| Age (10 years)                      | 0.50 | 0.25     | 1.03 | 0.060        | 0.56 | 0.27    | 1.16 | 0.508        | 0.50 | 0.23    | 1.09  | 0.082        | 0.51               | 0.24    | 1.05 | 0.066        |
| Gravidity                           | 1.17 | 0.95     | 1.45 | 0.141        | 1.18 | 0.95    | 1.47 | 0.129        | 1.23 | 0.97    | 1.56  | 0.082        | 1.17               | 0.95    | 1.45 | 0.146        |
| Season#                             | 1.17 | 0.78     | 1.77 | 0.444        | 1.15 | 0.76    | 1.75 | 0.508        | 1.21 | 0.79    | 1.86  | 0.387        | 1.29               | 0.85    | 1.95 | 0.224        |
| IPTp-SP doses                       | 1.15 | 0.80     | 1.65 | 0.453        | 1.49 | 0.95    | 2.25 | 0.083        | 1.69 | 1.00    | 2.89  | 0.052        | 1.20               | 0.85    | 1.70 | 0.309        |
| AL                                  | 0.82 | 0.53     | 1.28 | 0.385        | 0.97 | 0.59    | 1.58 | 0.896        | 0.83 | 0.49    | 1.41  | 0.499        | 0.87               | 0.56    | 1.34 | 0.523        |
| Visit*                              | 0.39 | 0.07     | 2.38 | 0.310        | 0.34 | 0.05    | 2.41 | 0.280        | 0.26 | 0.03    | 2.25  | 0.223        | 0.27               | 0.05    | 1.65 | 0.158        |
| SeasonXvisit                        | 2.38 | 0.89     | 6.34 | 0.083        | 2.61 | 0.93    | 7.33 | 0.069        | 2.97 | 0.93    | 9.47  | 0.066        | 1.91               | 0.71    | 5.13 | 0.201        |
| -Visit* in high transmission season | 0.94 | 0.18     | 4.76 | 0.938        | 0.88 | 0.15    | 5.25 | 0.893        | 0.78 | 0.11    | 5.67  | 0.808        | 0.52               | 0.10    | 2.61 | 0.429        |
| -Season# in Del samples             | 2.79 | 1.14     | 6.80 | <b>0.024</b> | 3.00 | 1.17    | 7.72 | <b>0.023</b> | 3.59 | 1.17    | 10.99 | <b>0.025</b> | 2.46               | 1.00    | 6.05 | <b>0.049</b> |
| AgeXvisit                           | 0.79 | 0.22     | 2.87 | 0.722        | 1.18 | 0.30    | 4.68 | 0.810        | 1.08 | 0.25    | 4.78  | 0.915        | 0.54               | 0.15    | 1.98 | 0.356        |
| -Age in Del samples                 | 0.40 | 0.16     | 1.12 | 0.083        | 0.66 | 0.21    | 2.13 | 0.492        | 0.54 | 0.15    | 1.99  | 0.358        | 0.28               | 0.09    | 0.80 | <b>0.018</b> |
| GravidityXvisit                     | 1.29 | 0.86     | 1.94 | 0.211        | 1.13 | 0.73    | 1.73 | 0.589        | 1.19 | 0.73    | 1.92  | 0.484        | 1.42               | 0.95    | 2.12 | 0.090        |
| -Gravidity in Del samples           | 1.52 | 1.07     | 2.14 | <b>0.018</b> | 1.33 | 0.92    | 1.93 | 0.134        | 1.46 | 0.95    | 2.26  | 0.088        | 1.66               | 1.18    | 2.33 | <b>0.004</b> |

| <i>dhps</i><br>Fixed effect(s)      | S436 |          |       |          | A437 |         |       |          |
|-------------------------------------|------|----------|-------|----------|------|---------|-------|----------|
|                                     | OR   | [95% CI] |       | <i>p</i> | OR   | [95%CI] |       | <i>p</i> |
| Age (10 years)                      | 2.06 | 0.79     | 5.37  | 0.137    | 0.68 | 0.32    | 1.47  | 0.329    |
| Gravidity                           | 0.85 | 0.65     | 1.12  | 0.258    | 1.10 | 0.88    | 1.39  | 0.399    |
| Season#                             | 1.60 | 0.93     | 2.75  | 0.089    | 0.76 | 0.49    | 1.19  | 0.227    |
| IPTp-SP doses                       | 0.95 | 0.63     | 1.42  | 0.790    | 1.63 | 0.93    | 2.86  | 0.089    |
| AL                                  | 0.94 | 0.57     | 1.56  | 0.821    | 0.67 | 0.40    | 1.12  | 0.125    |
| Visit*                              | 1.64 | 0.20     | 13.39 | 0.646    | 0.69 | 0.07    | 6.93  | 0.756    |
| SeasonXvisit                        | 0.90 | 0.27     | 3.05  | 0.867    | 1.79 | 0.46    | 6.90  | 0.398    |
| -Visit* in high transmission season | 1.47 | 0.21     | 10.21 | 0.694    | 1.24 | 0.15    | 10.15 | 0.840    |
| -Season# in Del samples             | 1.44 | 0.47     | 4.41  | 0.522    | 1.36 | 0.38    | 4.87  | 0.635    |
| AgeXvisit                           | 0.72 | 0.15     | 3.55  | 0.686    | 0.66 | 0.13    | 3.47  | 0.626    |
| -Age in Del samples                 | 1.49 | 0.39     | 5.72  | 0.565    | 0.45 | 0.10    | 1.96  | 0.288    |
| GravidityXvisit                     | 1.06 | 0.66     | 1.70  | 0.814    | 1.08 | 0.64    | 1.80  | 0.780    |
| -Gravidity in Del samples           | 0.90 | 0.60     | 1.35  | 0.621    | 1.19 | 0.75    | 1.88  | 0.464    |

Del = delivery; AL = artemether-lumefantrine therapy #dry season = 0, rainy season = 1; \*ANC booking = 0, Delivery = 1; age centred at 25 years
