# Supplementary material for: Increase in the prevalence of mutations associated with sulfadoxine–pyrimethamine resistance in Plasmodium falciparum isolates collected from early to late pregnancy in Nanoro, Burkina Faso
Source: Springer Nature journal article supplement (doi:10.1186/s12936-017-1831-y), 2017-04-28
Supplement: MOESM9 [file 12255630]

Table S9. Multivariate mixed effects logistic regression for *dhfr* and *dhps* gene mutations in pregnant women sampled at ANC booking and the GP (pure mutants versus wild type/mixed)

Odds ratios (OR) with 95% CI and *p* values are presented (*p* values <0.05 in bold).

| <i>dhfr</i><br>Fixed effect(s) | <b>N51</b> |          |      |              | <b>C59</b> |         |      |          | <b>S108</b> |         |      |          | <b>triple <i>dhfr</i></b> |         |      |              |
|--------------------------------|------------|----------|------|--------------|------------|---------|------|----------|-------------|---------|------|----------|---------------------------|---------|------|--------------|
|                                | OR         | [95% CI] |      | <i>p</i>     | OR         | [95%CI] |      | <i>p</i> | OR          | [95%CI] |      | <i>p</i> | OR                        | [95%CI] |      | <i>p</i>     |
| Age                            | 0.80       | 0.57     | 1.13 | 0.213        | 0.91       | 0.64    | 1.29 | 0.603    | 0.92        | 0.65    | 1.31 | 0.656    | 0.81                      | 0.57    | 1.15 | 0.237        |
| Season#                        | 1.18       | 0.78     | 1.77 | 0.430        | 1.15       | 0.76    | 1.74 | 0.511    | 1.21        | 0.80    | 1.83 | 0.361    | 1.30                      | 0.86    | 1.96 | 0.216        |
| Visit*                         | 1.24       | 0.85     | 1.81 | 0.254        | 1.12       | 0.76    | 1.64 | 0.566    | 1.03        | 0.71    | 1.51 | 0.857    | 1.17                      | 0.80    | 1.72 | 0.409        |
| VisitXage                      | 1.42       | 0.98     | 2.06 | 0.062        | 1.15       | 0.79    | 1.67 | 0.472    | 1.08        | 0.75    | 1.56 | 0.685    | 1.46                      | 1.00    | 2.12 | 0.050        |
| - Age in GP samples            | 1.14       | 1.00     | 1.30 | <b>0.046</b> | 1.05       | 0.92    | 1.19 | 0.511    | 1.00        | 0.88    | 1.14 | 0.971    | 1.18                      | 1.03    | 1.34 | <b>0.014</b> |

| <i>dhps</i><br>Fixed effect(s) | <b>S436</b> |          |      |          | <b>A437</b> |         |      |              |
|--------------------------------|-------------|----------|------|----------|-------------|---------|------|--------------|
|                                | OR          | [95% CI] |      | <i>p</i> | OR          | [95%CI] |      | <i>p</i>     |
| Age                            | 1.24        | 0.87     | 1.75 | 0.231    | 0.91        | 0.63    | 1.31 | 0.626        |
| Season#                        | 1.47        | 0.97     | 2.24 | 0.069    | 0.76        | 0.49    | 1.19 | 0.228        |
| Visit*                         | 0.93        | 0.64     | 1.35 | 0.690    | 0.76        | 0.50    | 1.15 | 0.198        |
| VisitXage                      | 0.82        | 0.56     | 1.18 | 0.286    | 1.32        | 0.89    | 1.96 | 0.161        |
| - Age in GP samples            | 1.01        | 0.89     | 1.15 | 0.863    | 1.21        | 1.05    | 1.40 | <b>0.010</b> |

#dry season = 0, rainy season = 1; \*ANC booking = 0, GP = 1; age centred at 25 years
